# Supplementary material for: Group cognitive behavioural therapy and weight regain after diet in type 2 diabetes: results from the randomised controlled POWER trial
Source: Springer Nature journal article supplement (doi:10.1007/s00125-017-4531-9), 2018-01-09
Supplement: MOESM1 [file 15352428]

## Electronic supplementary material

**ESM Table 1: Baseline characteristics of excluded vs. included participants**

| Characteristic <sup>a</sup>       | Excluded participants <sup>b</sup> (n=48) | Included participants (n=158) | p-value <sup>c</sup> |
|-----------------------------------|-------------------------------------------|-------------------------------|----------------------|
| Age (y, range)                    | 50.6 (25-70)                              | 53.7 (28-74)                  | 0.141                |
| Female (No. (%))                  | 30 (62.5)                                 | 88 (55.7)                     | 0.404                |
| Caucasian (No. (%))               | 25 (52.1)                                 | 87 (55.1)                     | 0.717                |
| Low education (No. (%))           | 14 (29.2)                                 | 46 (29.1)                     | 0.497                |
| Years after diagnosis T2D         | 8.0 (2.5-13.0)                            | 9.0 (3.0-15.0)                | 0.414                |
| Weight (kg)                       | 106.9±16.9                                | 106.1±20.8                    | 0.806                |
| HbA1 <sub>c</sub> (%)             | 8.5 (7.6-10.0)                            | 7.6 (7.0-8.5)                 | 0.001                |
| HbA1 <sub>c</sub> (mmol/mol)      | 69.5 (59.3-86.3)                          | 60.0 (53.0-69.0)              | 0.001                |
| Fasting glucose (mmol/l)          | 10.1 (8.3-13.0)                           | 8.4 (6.8-10.6)                | <0.001               |
| LDL cholesterol (mmol/l)          | 2.6 (2.0-3.5)                             | 2.6 (2.1-3.1)                 | 0.706                |
| Insulin users (No. (%))           | 25 (52.1)                                 | 101 (63.9)                    | 0.456                |
| Insulin dose among users (IU/day) | 111.1±61.6                                | 97.8±49.0                     | 0.258                |
| Depression score (HADS)           | 7.0 (4.0-11.0)                            | 7.0 (4.0-9.0)                 | 0.395                |
| Anxiety score (HADS)              | 8.0 (4.0-11.0)                            | 6.0 (3.0-9.0)                 | 0.038                |
| Quality of life (EQ5D score)      | 0.81 (0.69-0.84)                          | 0.78 (0.65-0.84)              | 0.320                |
| Eating disorder (EDE-Q score)     | 2.1±1.3                                   | 2.2±1.1                       | 0.946                |
| Physical activity (SQUASH score)  | 4200 (1440-8405)                          | 2940 (1350-5775)              | 0.327                |

<sup>a</sup>Data are mean±SD, median (interquartile range) or number (%). <sup>b</sup>Participants were excluded when they lost <5% of body weight during the 8-week phase-in very low-calorie diet. <sup>c</sup>Between-group differences were analysed using a Pearson Chi-Square test, an independent samples t-test or a Mann-Whitney U test, depending on normality of the data.

T2D = type 2 diabetes; HbA1<sub>c</sub> = glycated haemoglobin; LDL = low-density lipoprotein; HADS = Hospital Anxiety and Depression Scale; EQ5D = EuroQol five-dimension questionnaire; EDE-Q = Eating Disorder Examination Questionnaire; SQUASH = Short Questionnaire to Assess Health Enhancing Physical Activity

**ESM Table 2: Linear mixed model of weight course from baseline to two years of follow-up and allocation to group (Intention-to-treat)**

| <b>Parameter</b>            | <b>Estimate</b> | <b>95%CI</b>     | <b>p-value</b> |
|-----------------------------|-----------------|------------------|----------------|
| Intercept                   | 106.769         | 102.327, 111.211 | <0.001         |
| Time                        | 0.361           | 0.293, 0.429     | <0.001         |
| Quadratic time              | -0.001          | -0.002, -0.001   | <0.001         |
| Logarithmic time            | -5.818          | -6.400, -5.237   | <0.001         |
| Allocation                  | -1.274          | -7.403, 4.855    | 0.682          |
| Time*allocation             | -0.033          | -0.127, 0.061    | 0.491          |
| Quadratic time*allocation   | 0.000           | -0.001, 0.001    | 0.720          |
| Logarithmic time*allocation | 0.473           | -0.331, 1.278    | 0.248          |
